# Supplementary material for: Identification of cis-regulatory modules in promoters of human genes exploiting mutual positioning of transcription factors
Source: PubMed Central journal article supplement (PMC3799424; doi:10.1093/nar/gkt578), 2013-08-02
Supplement: supp_gkt578_nar-03421-n-2012-File005.pdf [file supp_gkt578_nar-03421-n-2012-File005.pdf]

Supplementary Figure 1: The figure shows the distribution of all the obtained z-score.

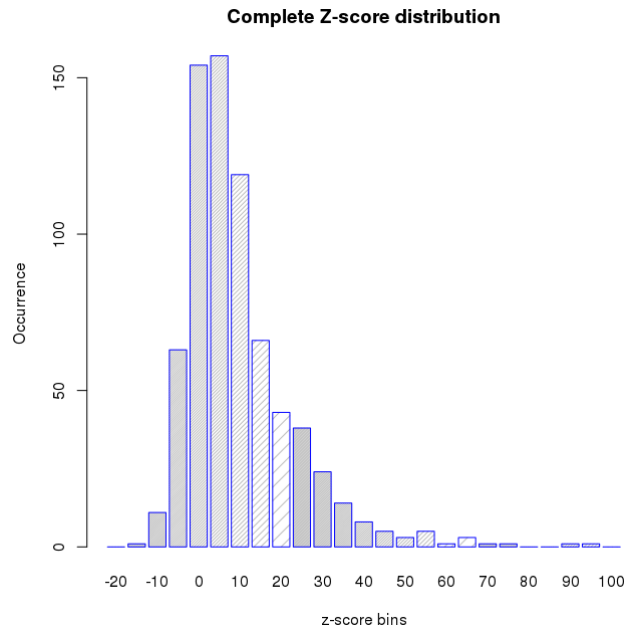

Supplementary Table 1: These factors are found to be significantly co-occurring with MyoD within  $\pm 100$ bp because of their similar or identical motif pattern.

| TF name  | TRANSFAC id | No of promoters with z-score | Consensus from TRANSFAC | Significant positions with p-values           |
|----------|-------------|------------------------------|-------------------------|-----------------------------------------------|
| E2A      | M00973      | 5221(52.74)                  | CACCTGNY                | -1(<2.2e-16)<br>1(<2.2e-16)                   |
| Myogenin | M00712      | 3599(55.08)                  | RGCAGSTG                | -1(<2.2e-16)<br>1(<2.2e-16)                   |
| E12      | M00693      | 3468(33.01)                  | RRCAGGTGNCV             | -1(<2.2e-16)<br>0(<2.2e-16)                   |
| TAL1     | M00993      | 2654(40.02)                  | TCCA KCTGNY             | 0(<2.2e-16)                                   |
| Ebox     | M01034      | 2463(47.26)                  | NCACSTGNCN              | -1(<2.2e-16)<br>1(<2.2e-16)                   |
| Lmo2     | M00277      | 1804(25.65)                  | CNNCAGGTGBNN            | 0(<2.2e-16)<br>49(=9.046e-12)                 |
| E47      | M00071      | 1220(16.31)                  | NNNMRCAGGTGTTMNN        | 0(<2.2e-16)<br>16(=1.936e-10)<br>33(<2.2e-16) |
| NeuroD   | M01288      | 972(26.69)                   | NNSCWGCTGNSY            | -3(<2.2e-16) 0(<2.2e-16)                      |

|                 |        |            |                  |                                                                |
|-----------------|--------|------------|------------------|----------------------------------------------------------------|
|                 |        |            |                  | 3(<2.2e-16)                                                    |
| LBP-1           | M00644 | 964(28.11) | CAGCTGS          | -1(<2.2e-16) 0(<2.2e-16)                                       |
| Tal-1alpha:E47  | M00066 | 871(7.77)  | NNNAACAGATGKTNNN | 0(<2.2e-16)                                                    |
| AP-4            | M00927 | 840(9.85)  | RNCAGCTGC        | -1(<2.2e-16) 0(<2.2e-16)                                       |
| HEB             | M00698 | 814(18.59) | RCCWGCTG         | -2(<2.2e-16)1(<2.2e-16)<br>2(<2.2e-16)                         |
| Tal-1beta:E47   | M00065 | 724(5.52)  | NNNAACAGATGKTNNN | 0(<2.2e-16)                                                    |
| Tal-1beta:ITF-2 | M00070 | 703(6.77)  | NNNAACAGATGKTNNN | 0(<2.2e-16)                                                    |
| AREB6           | M00413 | 642(18.08) | WNWCACCTGWNN     | -33(<2.2e-16)<br>0(<2.2e-16)<br>16(=4.968e-12)<br>33(<2.2e-16) |

Supplementary Table 2: **Summary of overlap between MyoD binding sites and those of other TFs, as discovered by ChIP-seq, reported in (27,55-57).**

| Cells   | Method   | TF        | Type    | Number of BS |        | Number and % of MyoD BS that overlap with BS of X | Ref.                  |
|---------|----------|-----------|---------|--------------|--------|---------------------------------------------------|-----------------------|
|         |          |           |         | X            | MyoD   |                                                   |                       |
| Primary | ChIP-seq | Tag-Snail |         | 5,465        | 9,300  | 442 – 4,8%                                        | (27)                  |
| C2C12   | ChIP-seq | c-Jun     | AP-1    | 18,712       | 23,271 | 5,961 – 25,6%                                     | (55,56)               |
| C2C12   | ChIP-seq | Msx1      | Homeo   | 62,225       | 23,271 | 9,837 – 42,3%                                     | (55,57)               |
| C2C12   | ChIP-seq | E2F4      | E2F     | 4,546        | 13,040 | 248 – 1.9 %                                       | Caltech, mouse ENCODE |
| C2C12   | ChIP-seq | SRF       | AT-rich | 2,610        | 13,040 | 485 – 3.7%                                        | Caltech, mouse ENCODE |
| C2C12   | ChIP-seq | CTCF      | CCCTC   | 21,117       | 13,040 | 539 – 4.1%                                        | Caltech, mouse ENCODE |

|       |          |          |       |        |        |               |                             |
|-------|----------|----------|-------|--------|--------|---------------|-----------------------------|
| C2C12 | ChIP-seq | NRSF     | NRSF  | 15,127 | 13,040 | 662 – 5.1%    | Caltech,<br>mouse<br>ENCODE |
| C2C12 | ChIP-seq | USF1     | E-box | 8,579  | 13,040 | 1,475 – 11.3% | Caltech,<br>mouse<br>ENCODE |
| C2C12 | ChIP-seq | CEBPbeta | CAAT  | 11,434 | 13,040 | 2,213 – 17%   | Caltech,<br>mouse<br>ENCODE |
| C2C12 | ChIP-seq | Max      | E-box | 8,930  | 13,040 | 2,488 – 19.1% | Caltech,<br>mouse<br>ENCODE |
| C2C12 | ChIP-seq | FosL1    | AP1   | 6,507  | 13,040 | 2,614 – 20.0% | Caltech,<br>mouse<br>ENCODE |
| C2C12 | ChIP-seq | Myog     | E-box | 24,360 | 13,040 | 4,394 – 33.7% | Caltech,<br>mouse<br>ENCODE |
| C2C12 | ChIP-seq | TCF12    | E-box | 16,467 | 13,040 | 6,973 – 53.5% | Caltech,<br>mouse<br>ENCODE |

Supplementary Table 3: **The table summarizes the proportion of the promoters having factors co-occurring with MyoD in classified promoters based on CpG islands.**

| Name     | Transfac ID | Proportion of promoters having MyoD+factor |           |           |
|----------|-------------|--------------------------------------------|-----------|-----------|
|          |             | CpG+                                       | CpG-      | Combined  |
| Kid3     | M01160      | 0.183862                                   | 0.168371  | 0.172845  |
| E2A      | M00973      | 0.163458                                   | 0.152197  | 0.162922  |
| myogenin | M00712      | 0.125648                                   | 0.114073  | 0.112307  |
| E12      | M00693      | 0.123112                                   | 0.0970006 | 0.108219  |
| TAL1     | M00993      | 0.0809222                                  | 0.0853194 | 0.0828184 |
| Ebox     | M01034      | 0.074928                                   | 0.0722691 | 0.0768583 |
| Lmo2     | M00277      | 0.0742363                                  | 0.0519875 | 0.0562941 |
| ELF1     | M01266      | 0.0517579                                  | 0.0518164 | 0.0504899 |
| ZNF333   | M01230      | 0.0340058                                  | 0.0481794 | 0.0439056 |
| E47      | M00071      | 0.0419597                                  | 0.0413333 | 0.0380703 |
| NFAT1    | M01281      | 0.0327378                                  | 0.0362843 | 0.0350434 |
| Ikaros   | M01169      | 0.0239769                                  | 0.0348295 | 0.0323597 |
| AREB6    | M00414      | 0.0300865                                  | 0.0307646 | 0.0314236 |
| NeuroD   | M01288      | 0.0405764                                  | 0.0340593 | 0.0303314 |
| LBP-1    | M00644      | 0.0463401                                  | 0.0368833 | 0.0300818 |
| Lyf-1    | M00141      | 0.0189049                                  | 0.0308502 | 0.0282407 |

|                         |        |            |           |           |
|-------------------------|--------|------------|-----------|-----------|
| AML1                    | M00751 | 0.0182133  | 0.031492  | 0.0281782 |
| AML1a                   | M00271 | 0.0182133  | 0.031492  | 0.0281782 |
| HOXA13                  | M01292 | 0.0189049  | 0.0318771 | 0.0279598 |
| Tal-<br>1alpha:E47      | M00066 | 0.0278963  | 0.0295238 | 0.0271797 |
| MAFB                    | M01227 | 0.0278963  | 0.0261435 | 0.0263059 |
| AP-4                    | M00927 | 0.0455331  | 0.0388944 | 0.0262123 |
| PPARG                   | M01270 | 0.0160231  | 0.0286252 | 0.0255882 |
| HEB                     | M00698 | 0.0319308  | 0.0294382 | 0.025401  |
| HNF4                    | M01032 | 0.0185591  | 0.0267853 | 0.0246833 |
| T3R                     | M00963 | 0.0199424  | 0.0304651 | 0.0246833 |
| TEF-1                   | M00704 | 0.0236311  | 0.0249027 | 0.0235911 |
| Pitx2                   | M00482 | 0.0149856  | 0.0249454 | 0.0229358 |
| Tal-<br>1beta:E47       | M00065 | 0.0223631  | 0.0237046 | 0.0225925 |
| LEF1                    | M00805 | 0.0202882  | 0.0235334 | 0.022062  |
| Tal-<br>1beta:ITF-<br>2 | M00070 | 0.0216715  | 0.0255017 | 0.0219372 |
| ARP-1                   | M00155 | 0.0130259  | 0.0227633 | 0.0206266 |
| PKNOX2                  | M01411 | 0.0200576  | 0.0224209 | 0.0204394 |
| AREB6                   | M00413 | 0.0146398  | 0.0212657 | 0.0200337 |
| AP-4                    | M00005 | 0.020634   | 0.0206666 | 0.0195344 |
| MAZ                     | M00649 | 0.0238617  | 0.0172864 | 0.0191288 |
| HOXA4                   | M00640 | 0.00945245 | 0.0218647 | 0.0190975 |
| ETS2                    | M01207 | 0.0187896  | 0.0201532 | 0.0190663 |
| PREP1                   | M01459 | 0.0137176  | 0.0186128 | 0.0169132 |
| TBX5                    | M01044 | 0.010951   | 0.0189979 | 0.016882  |
| CKROX                   | M01175 | 0.0262824  | 0.0130076 | 0.0166635 |
| PU.1                    | M00658 | 0.0165994  | 0.0169869 | 0.0164139 |
| Meis2                   | M01488 | 0.0154467  | 0.0175859 | 0.0162579 |
| MEIS1                   | M00419 | 0.0153314  | 0.0161311 | 0.0162579 |
| SREBP-1                 | M00220 | 0.0102594  | 0.0175431 | 0.0160706 |
| Sp1                     | M00933 | 0.0272046  | 0.0115956 | 0.0159146 |
| Pax-4                   | M00377 | 0.00783862 | 0.0181421 | 0.0158522 |
| MEF-2                   | M00233 | 0.00876081 | 0.0174575 | 0.015665  |

Supplementary Table 4: **The table summarizes the factors significantly co-occurring with MyoD (z-score > 3). But no positions were detected to be significant with the z-score above 10.**

| TF name | TRANSFAC id | No of promoters | Consensus from TRANSFAC |
|---------|-------------|-----------------|-------------------------|
| Meis1   | M01419      | 498             | WANNASCTGTCAAWNN        |
| STAT5A  | M00499      | 497             | NNNTTCYN                |
| SREBP2  | M01177      | 467             | NNGYCACNNSMN            |
| TFII-I  | M00706      | 461             | RGAGGKAGG               |
| Ets     | M00971      | 459             | ACTTCCTS                |
| MRG2    | M01395      | 440             | NANNASCTGTCAANN         |
| ETF     | M00695      | 438             | GVGGMGG                 |
| Sp1     | M00931      | 424             | GGGGCGGGGC              |
| COUPTF  | M01036      | 422             | NNNNNTGACCYTTGNMCNYNGMN |

|                    |        |     |                        |
|--------------------|--------|-----|------------------------|
| TGIF2              | M01407 | 420 | AANNAGCTGTCAAWN        |
| PU.1               | M01172 | 418 | NNNNYYACTTCCTCTTTY     |
| NERF1a             | M00531 | 414 | YRNCAGGAAGYRNSTBDS     |
| SP4                | M01273 | 405 | SCCCCGCCCCS            |
| ATF6               | M00483 | 400 | TGACGTGG               |
| Nanog              | M01247 | 393 | NNWNNANAACAARGNNNNN    |
| AP-2rep            | M00468 | 391 | CAGTGGG                |
| RREB-1             | M00257 | 388 | CCCCAAACMMCCCC         |
| LF-A1              | M00646 | 388 | GGGSTCWR               |
| BLIMP1             | M01066 | 385 | AGRAAGKGAAAGKR         |
| KROX               | M00982 | 377 | CCCGCCCCRCCCC          |
| CTCF               | M01259 | 373 | NNNNNNCCASNAGRKGGCRS   |
| E2F6               | M01252 | 363 | CNTTTCNT               |
| STAT6              | M00494 | 349 | NAWTCCN                |
| NURR1              | M01269 | 344 | YRRCCTT                |
| TTF-1              | M00794 | 341 | NNNNCAAGNRNN           |
| SMAD4              | M00733 | 337 | GKSRKKCAGMCANCY        |
| IRF                | M00972 | 336 | RAAANTGAAAN            |
| ESE1               | M01214 | 336 | DRYTTCTGTW             |
| SREBP              | M01168 | 333 | NNNNYCACNCCANN         |
| NUR77              | M01217 | 326 | NTGACCTBN              |
| ATF5               | M01295 | 319 | CYTCTYCCTTA            |
| Elf-1              | M00746 | 316 | RNWMBAGGAART           |
| RP58               | M00532 | 312 | NNAACATCTGGA           |
| HNF4,              | M00967 | 309 | AARGTCCAN              |
| PPAR,              | M00762 | 308 | RGGNCAAAGGTCA          |
| CACCC-binding      | M00721 | 307 | CANCCNNWGGGTGDGG       |
| Sp3                | M00665 | 305 | ASMCTTGGGSRGGG         |
| STAT               | M00777 | 303 | NNNNNTTCTKGGA          |
| USF2               | M00726 | 300 | CASGYG                 |
| Tel-2              | M00678 | 298 | YTACTTCCTG             |
| SMAD3              | M00701 | 295 | TGTCTGTCT              |
| NRSF               | M00256 | 295 | TTCAGCACCACGGACAGMGCC  |
| HIC1               | M01072 | 294 | NSNNNTGCCCCSNN         |
| ZNF219             | M01122 | 293 | CRCCCCCNCCC            |
| ISGF-3             | M00258 | 285 | CAGTTTCWCTTTYCC        |
| PPARalpha:RXRalpha | M00518 | 282 | NNRGGTCATWGGGGTSANG    |
| PR,                | M00960 | 281 | NWNAGRACAN             |
| SP1:SP3            | M01219 | 280 | CCSCCCCYCC             |
| GR                 | M00205 | 280 | GGTACAANNNGTYCTK       |
| BCL6               | M01183 | 272 | YNNNNNRNWNNNYTTT       |
| AP-2               | M00915 | 271 | SNNCCNCAGGCN           |
| STAT1              | M01260 | 270 | NNTTTCYNGGAARNNNNNNNNN |
| HMG1Y              | M01010 | 269 | NNKNAWTTTNYTNN         |
| HNF3               | M01012 | 264 | NNNNNTRTTRYTYWNKN      |
| CP2/LBP-1c/LSF     | M00947 | 264 | GCTGGNTNGNNCYNG        |
| deltaEF1           | M00073 | 261 | NNNCACCTNAN            |
| ZBRK1              | M01105 | 260 | GGGSMGCAGNNNTTT        |
| p300               | M00033 | 260 | NNNGGAGTNNNS           |

|              |        |     |                        |
|--------------|--------|-----|------------------------|
| FLI1         | M01208 | 260 | CMGGAWGTSMN            |
| Egr          | M00807 | 259 | GTGGGSGCRRS            |
| FOXJ2        | M00422 | 253 | NNNWAAAAYAAAYANNNNN    |
| FAC1         | M00456 | 250 | NNNCAMAAACACRNA        |
| LRH1         | M01142 | 248 | NNRRCCTTGVAN           |
| IRF3         | M01279 | 247 | NBNBTTTCSCTTT          |
| P50:RELA-P65 | M01224 | 246 | GGANTTYCCCWN           |
| Pax          | M00808 | 244 | CTGGAACMAC             |
| EBF          | M00977 | 244 | KTCCCYWGRGA            |
| POU5F1       | M01307 | 243 | NATGCAANNN             |
| NF-E2        | M00037 | 241 | TGCTGAGTCAY            |
| NF-kappaB    | M00774 | 240 | NNNNKGGRAANTCCCN       |
| FOXO3A       | M01137 | 240 | TRTAAACAANWN           |
| ZID          | M00085 | 239 | NGGCTCYATCAYC          |
| NF-muE1      | M00651 | 239 | CGGCCATCT              |
| FOXD3        | M00130 | 239 | NAWTGTTTRTTT           |
| WT1          | M01118 | 238 | SMCNCNSC               |
| KAI1         | M01119 | 236 | NTCCTGCNAN             |
| GATA-4       | M00632 | 236 | AGATADMAGGGA           |
| CP2          | M00072 | 236 | GCHCDAMCCAG            |
| ERR          | M00511 | 235 | NNNTNAAGGTCANN         |
| NF-1         | M00806 | 234 | NTGGNNNNNNGCCAANN      |
| FOX          | M00809 | 232 | KWTTGTTTRTTTW          |
| TEF          | M01305 | 231 | YACATTCCWSNG           |
| Nrf-2        | M00821 | 230 | NTGCTGAGTCAKN          |
| TBX5         | M01019 | 226 | NNAGGTGTNANN           |
| HNF3alpha    | M00724 | 226 | TRTTTGYTYWN            |
| Olf-1        | M00261 | 225 | NNCDABTCCCYAGRGARBNKGN |
| LRF          | M01100 | 225 | VNNRMCCCC              |
| COUP         | M00765 | 225 | TGACCTTTGACCC          |
| Hand1:E47    | M00222 | 220 | NNNNGNRTCTGGMWTT       |
| Zic2         | M00449 | 218 | KGGGTGGTC              |
| GCNF         | M00526 | 217 | NTCAAGKTCAAGKTCANN     |
| HFH3         | M00289 | 214 | KNNTRTTTRTTTA          |
| RelB:p52     | M01239 | 213 | GGGNTTTCC              |
| P50:P50      | M01223 | 210 | NRGGGAMTNCCCN          |
| c-Myc        | M01145 | 210 | RACCACGTGCTC           |
| AP-2gamma    | M00470 | 206 | GCCYNNNGGS             |
| ER           | M00959 | 205 | NAGGTCANNNY            |
| NF-AT        | M00935 | 204 | NWGGAANWN              |
| Freac-7      | M00293 | 203 | WNNANATAAAAYANNNN      |
| SPI-B        | M01204 | 201 | AAAAWGMGAAGTWNSN       |
| FRA1         | M01267 | 199 | TGAGTCAN               |
| C/EBPgamma   | M00622 | 199 | CTBATTTCARAAN          |
| Six-6        | M01398 | 198 | NATRGGGTATCANNWNT      |
| Pax-2        | M00486 | 198 | NNNAAASNN              |
| c-Rel        | M00053 | 197 | SGGRNTTTCC             |
| HSF          | M00641 | 196 | TTCCMGARGYTTC          |
| Staf         | M00262 | 195 | NTTWCCCANMATGCAYYRCGNY |
| ICSBP        | M00699 | 195 | RAARTGAAACTG           |
| STAT1:STAT1  | M01212 | 194 | NTTTCCMGAAAA           |

|                        |        |     |                              |
|------------------------|--------|-----|------------------------------|
| Six-1                  | M01313 | 194 | NNNRGGGTATCANNNT             |
| HNF3beta               | M00131 | 194 | KGNANTRTTRYTTW               |
| Gfi-1                  | M00250 | 194 | NNNNNNNAAATCACWGYNNNNNNN     |
| BRCA1:USF2             | M01082 | 194 | KTNNGTTG                     |
| alpha-CP1              | M00687 | 194 | CAGCCAATGAG                  |
| Helios                 | M01004 | 193 | WNWAGGAAAAN                  |
| GLI                    | M01037 | 193 | NBTGGGTGGTCN                 |
| IRF-7                  | M00453 | 192 | TNSGAAWNCGAAANTNNN           |
| GABP                   | M01258 | 192 | CACTTCCGNNN                  |
| DBP                    | M00624 | 191 | AGCAHAC                      |
| SOX4                   | M01308 | 190 | AACAAWGR                     |
| PEA3                   | M00655 | 190 | ACWTCK                       |
| PPARgamma:R<br>XRalpha | M00512 | 189 | NNWGRGGTCAAAGGTCANNNN        |
| LEF1                   | M01022 | 189 | NWTCAAAGNN                   |
| HFH4                   | M00742 | 189 | AWKTGTTTGTTA                 |
| AML                    | M00769 | 189 | NNGKNTGTGGTTWNC              |
| Pax-5                  | M00143 | 187 | BCNNNRNGCANBGNTGNRTAGCSGCHNB |
| FOXO4                  | M00472 | 187 | RWAAACAANNN                  |
| PEBP                   | M00984 | 184 | GNTNACCACARANNK              |
| Oct-1                  | M00342 | 184 | TATGCAAATN                   |
| GATA-3                 | M00077 | 184 | NNGATARNG                    |
| FOXO1                  | M00473 | 184 | NRWAAACAAN                   |
| IRF-2                  | M00063 | 181 | GAAAAGYGAAASY                |
| IRF-1                  | M00062 | 181 | SAAAAGYGAAACC                |
| Octamer                | M00795 | 180 | TNATTTGCATN                  |
| TATA                   | M00216 | 178 | NCTATAAAAR                   |
| SOX10                  | M01131 | 178 | CWTTGTN                      |
| MYB                    | M00913 | 178 | NAACNGNCN                    |
| MAZR                   | M00491 | 178 | NSGGGGGGGGMCN                |
| TFIIA                  | M00707 | 177 | TMTRWRAGGRSS                 |
| STAT3:STAT3            | M01220 | 177 | TTKMCGGGAAMTSC               |
| FOXM1                  | M00630 | 177 | ARATKGAST                    |
| TCF11:MafG             | M00284 | 175 | NNNNNATGACTCAGCANTTNG        |
| PPARalpha:R<br>XRalpha | M00242 | 175 | CARAAC TAGGNCAAAGGTCA        |
| TCF-4                  | M00671 | 174 | SCTTTGAW                     |
| SRF                    | M01257 | 174 | NNCCA WAWAAGGNMANNN          |
| SOX2                   | M01272 | 174 | NNNNCCWTTGTTWTKN             |
| Freac-3                | M00291 | 174 | NNNNNGTAAATAACA              |
| HMG                    | M00750 | 173 | GGAAAWT                      |
| AP-2alphaA             | M01045 | 171 | ANNGCC TNAGGSNNT             |
| Osf2                   | M00731 | 170 | ACCACANM                     |
| TBX18                  | M01262 | 169 | AGGTGTGAAATTCGCACCT          |
| STAT4                  | M00498 | 168 | SNWTTCNN                     |
| Cdx                    | M00991 | 167 | NAYNRHNARAKTHATAAA           |
| RUSH-1alpha            | M01107 | 165 | NNMCWTNKNN                   |
| HFH8                   | M00294 | 165 | NNNTGTTTATNTR                |
| RFX                    | M00975 | 164 | SHGTTGCSN                    |
| TFE                    | M01029 | 163 | TCATGTGN                     |
| PARP                   | M01211 | 163 | YDRGAAA WAS                  |
| OTX                    | M01117 | 163 | GATTANNT                     |

|                     |        |     |                             |
|---------------------|--------|-----|-----------------------------|
| SRY                 | M00160 | 161 | NWWAACAAWANN                |
| OCT-x               | M00210 | 161 | CTNATTTGCATAY               |
| c-Ets-1             | M01078 | 161 | NNNRCCGGAWRYNNNN            |
| aMEF-2              | M00403 | 161 | CKGDYTAATAAACYMM            |
| MEF2A               | M01301 | 160 | RGYTATTTTAR                 |
| Myc                 | M00799 | 159 | CACGTGS                     |
| MIF-1               | M00279 | 159 | NNGTTGCWWGGYAACNGS          |
| NF-Y                | M00209 | 157 | NCTGATTGGYTASY              |
| p53                 | M00761 | 156 | RGRCAWGNCY                  |
| HNF4alpha           | M00638 | 156 | VTGAACTTGMMB                |
| TRF1                | M01237 | 155 | YTAGGGTTAGGGTTR             |
| Nkx2-1              | M01312 | 155 | NNANCCACTTGAMNTT            |
| HNF3A               | M01261 | 155 | RWGTAACAN                   |
| C/EBPbeta           | M00109 | 155 | RNRTKDNMMAAKNN              |
| ATF3                | M00513 | 154 | CBCTGACGTCANCS              |
| NKX25               | M01414 | 153 | NNANCCACTTRAAWTT            |
| AR                  | M00953 | 152 | NNNGNRRGNACANNGTGTTCTNNNNNN |
| Zec                 | M01081 | 151 | CAAGGTTGGTTGC               |
| VDR                 | M00961 | 151 | CNSNNTGAACCN                |
| MEIS1B:HOXA<br>9    | M00421 | 150 | TGACASTTWAYRR               |
| FOXP3               | M00992 | 149 | RWARTGTTGTTTCAKAC           |
| RXR                 | M01152 | 148 | NNAGTTCA                    |
| Elk-1               | M00025 | 148 | NNNNCCGGAARTNN              |
| AP-2alpha           | M00469 | 148 | GCCNNNRGS                   |
| Nkx6-1              | M00424 | 147 | TWTTTAATTGGTT               |
| HSF2                | M01244 | 147 | GAANRTTCTAGAA               |
| C/EBP               | M00770 | 147 | NNNTKNNGNAAN                |
| Zic1                | M00448 | 146 | KGGGTGGTC                   |
| mTERF               | M01245 | 146 | TGGTARWRGTYGGT              |
| six4                | M01374 | 145 | ANNNATGACACCNNNNN           |
| MTF1                | M01242 | 145 | GTGTGCANMACTTTGCGCAC        |
| SOX                 | M01014 | 144 | CTCTTTGTTANGA               |
| GAF                 | M01209 | 144 | CRNATTCYK                   |
| AP-1                | M00199 | 144 | NTGASTCAG                   |
| MEIS1A:HOXA<br>9    | M00420 | 143 | TGACAGKTTTAYGA              |
| RBP-Jkappa          | M01112 | 142 | ANCGTGGGAAM                 |
| NGFI-C              | M00244 | 142 | WTGCGTGGGYGG                |
| GATA-1              | M00128 | 142 | NNCWGATARNNNN               |
| ATF1                | M00691 | 141 | CYYTGACGTCA                 |
| ELF5                | M01197 | 140 | WNAAGGAARTW                 |
| Barhl2              | M01446 | 139 | NAMAANCAATTAANNN            |
| RSRFC4              | M00026 | 138 | RNKCTATTTWTAGMWN            |
| CHOP:C/EBPa<br>lpha | M00249 | 138 | NNRTGCAATMCCC               |
| Tst-1               | M00133 | 137 | NNKAATTAVAVTDN              |
| c-Myb               | M00183 | 137 | NNNAACTGNC                  |
| C/EBPdelta          | M00621 | 136 | MATTKCNTMAYY                |
| USF                 | M00122 | 135 | NNRNCACGTGNYYN              |
| Pit-1               | M00802 | 135 | NMTTCATAAWTATWNMNA          |
| GATA                | M00789 | 135 | WGATARN                     |



|               |        |     |                              |
|---------------|--------|-----|------------------------------|
| GATA-6        | M00462 | 135 | NNNGATWANN                   |
| FOXO3         | M00477 | 134 | TNNTTGTTTACNTW               |
| Gfilb         | M01058 | 133 | TAAATCACTGCW                 |
| Roaz          | M00467 | 132 | GCACCCAWGGGTGM               |
| Oct-2         | M01368 | 131 | NNNTATGCAAATNNNN             |
| Nkx3-2        | M01482 | 131 | NNNAACCACTTAANNAN            |
| HOXA7         | M01108 | 131 | YCAATCT                      |
| c-Ets-1 (p54) | M00074 | 131 | NNACMGAWRTNN                 |
| Bach2         | M00490 | 131 | SRTGAGTCANC                  |
| HES1          | M01009 | 130 | ANSBCKYGTGSCNNG              |
| HOXA10        | M01464 | 129 | NNNGYAATAAAATNNW             |
| Pax-8         | M00328 | 128 | NCNNTNNTGCRTGANNNN           |
| PLZF          | M01075 | 126 | KTNNWTNGNNGNTAAAGYTTKATYWGTC |
| STAT5B        | M00459 | 125 | NAWTCYNGGAAWTN               |
| RFX1          | M00281 | 125 | NNGTNRCNATRGYAACNN           |
| IRX4          | M01410 | 124 | WNNNWACATGTWAWANN            |
| HOXD13        | M01404 | 124 | NNNYAATAAAANNNN              |
| Bach1         | M00495 | 124 | NNSATGAGTCATGNT              |
| VDR:RXR       | M01202 | 123 | GGGTCAWNGRGTTC               |
| RORalpha      | M01138 | 123 | WAANTRGGTCA                  |
| STATx         | M00223 | 122 | TTCCCCGKAA                   |
| GCM           | M00634 | 122 | CNNRCCC GCATD                |
| E2F1          | M01250 | 122 | CGTTTCNN                     |
| AhR           | M00139 | 122 | CCYCNRRSTNGCGTGASA           |
| hoxa9         | M01351 | 121 | NCGGYCATWAAAWTANW            |
| Egr-2         | M00246 | 121 | NTGCGTRGGCGK                 |
| GATA-2        | M00348 | 120 | NNWGATAASA                   |
| FXR           | M01268 | 119 | AGGTCAN                      |
| Irx2          | M01405 | 118 | WNNNTACATGTANNWNW            |
| RORalpha2     | M00157 | 117 | NWAWNTAGGTCAN                |
| ATF4          | M00514 | 117 | CVTGACGYMABG                 |
| HOXB9         | M01426 | 116 | NRRGCMATAAAANNNN             |
| FXR/RXR-alpha | M00631 | 116 | CARGKTSAWTRACC               |
| TBX22         | M01195 | 115 | AGGTGTGAAWTTSTCACCT          |
| HNF6          | M00639 | 115 | HWAAATCAATAW                 |
| SOX5          | M00042 | 114 | NNAACAATNN                   |
| RORalpha1     | M00156 | 114 | NWAWNNAGGTCAN                |
| POU2F3        | M01476 | 114 | NNNTATGCAAATNNNN             |
| Nkx5-1        | M01413 | 114 | NNNAGCAATTAANNNAT            |
| GATA-X        | M00203 | 114 | NGATAAGNMNN                  |
| Freac-2       | M00290 | 114 | NNANNGTAAACAANNN             |
| Alx-4         | M00619 | 113 | CCTGAGAATAATC                |
| Nkx6-2        | M00489 | 112 | NWADTAAWTANN                 |
| C/EBPalpha    | M00116 | 112 | NNATTRCNAANNN                |
| DMRT1         | M01146 | 111 | TTGMTACAWTGTTKC              |
| TCF11         | M00285 | 109 | GTCATNNWNNNNN                |
| Otx1          | M01366 | 108 | NNNRGGGATTAATWNNN            |
| Irx5          | M01472 | 108 | NNNNWACATGTWNNWNW            |
| c-Myc:Max     | M00118 | 108 | NNACCACGTGGTNN               |
| POU6F1        | M01479 | 107 | NNNNWTAATGAGSTNNN            |

|                         |        |     |                           |
|-------------------------|--------|-----|---------------------------|
| AFP1                    | M00616 | 106 | ATTAAYTRCAC               |
| ZABC1                   | M01306 | 105 | ATTCCNAC                  |
| Freac-4                 | M00292 | 105 | CTWAWGTAAACANWGN          |
| Barhl-1                 | M01332 | 105 | NANAACCAATTARNNN          |
| SOX9                    | M00410 | 104 | NNNNAACAATRGNN            |
| AP-3                    | M00690 | 104 | TCYMMATT                  |
| POU1F1                  | M00744 | 103 | ATGAATAAWT                |
| Ncx                     | M01420 | 102 | NAATNAATTAATAANWW         |
| Lmx-1                   | M01409 | 102 | CNNNTTAATTAAWWNNN         |
| Brn-2                   | M00145 | 102 | NNCATNSRWAATNMRN          |
| Arnt                    | M00539 | 102 | NNNNNRTCACGTGAYNNNNN      |
| Otx3                    | M01403 | 101 | NNRWNMGATTANKNNN          |
| Cdx-1                   | M01373 | 101 | NNGGTMATAAAAANN           |
| POU6F1                  | M01462 | 100 | NNNNATAATGAGSTNNN         |
| Egr-3                   | M00245 | 99  | NTGCGTGGGCGK              |
| POU3F2                  | M00463 | 98  | ATGMATWWATTTCAT           |
| Nkx2-2                  | M00485 | 98  | TTAAGTRSTT                |
| Mox1                    | M01443 | 98  | NNNGTAATTANNYNAG          |
| IRXB3                   | M01377 | 95  | NANNTACATGTANNWNT         |
| HNF1                    | M00206 | 95  | DGTTAATKAWTNACCAM         |
| Otx2                    | M01387 | 94  | NNNRGGGATTAATNNNN         |
| Nkx3A                   | M01383 | 94  | NNNNAAGTACTTAAANN         |
| HOXD3                   | M01338 | 93  | YTGNNNTAATTANNNN          |
| HMX1                    | M01481 | 93  | NNNAGCAATTAANGNNN         |
| Brachyury               | M00150 | 93  | MKHNTSACACCTAGGTGTGAAATT  |
| TBP                     | M00471 | 92  | TATAAATW                  |
| Pbx-1                   | M01017 | 92  | NNATCAATCANN              |
| MRF-2                   | M00454 | 89  | AWSCACAATACNVA            |
| Lhx5                    | M01353 | 88  | NNNATTAATTAAWWNNN         |
| lmx1b                   | M01363 | 87  | NNWWWTTAATTAATNNN         |
| Evi-1                   | M00080 | 86  | AGATAAGATAA               |
| Max                     | M00119 | 84  | NNANCACGTGNTNN            |
| HOXC9                   | M01416 | 83  | NNNGGTCATTAANNNN          |
| STAT3                   | M00225 | 82  | NGNNATTTCCSGGAARTGNNN     |
| HOXA6                   | M01392 | 82  | AMGKTAATTACCNNAN          |
| AIRE                    | M01000 | 82  | GGTTATTAATTGGTTATATTGGTTD |
| HoxB5                   | M01319 | 81  | ANGNTAATTANCNNAN          |
| HOXC4                   | M01369 | 80  | CNNNTTAATTAANNANN         |
| Barx1                   | M01340 | 80  | MNRNYAATTRSYNNAW          |
| HOXA5                   | M01452 | 79  | ANGNTAATTANCNNAN          |
| Lhx3                    | M01471 | 78  | NNAATTAATTAAWWNNN         |
| HOXC-8                  | M01321 | 78  | NNNNNGTAATTANNNT          |
| DMRT2                   | M01147 | 77  | NAWWTGWTACATTGW           |
| HoxA2                   | M01402 | 76  | ANGGTAATTANCNNAN          |
| Brn-3c                  | M01408 | 76  | NNTTATTAATKANKNC          |
| DMRT3                   | M01148 | 75  | NWWTGWTACAWTKT            |
| PPARgamma:R<br>XRalpha, | M00515 | 73  | AAGTAGGTCACNGTGACCYACTT   |
| HOXA1                   | M01487 | 73  | NTNAGCTAATTAMNNY          |
| Lhx4                    | M01421 | 70  | NANNCTAATTAGNTWTG         |
| ipfl                    | M01438 | 70  | NNRNTAATTAGYNCAN          |
| En-1                    | M01365 | 69  | NNNAACTAATTARKNN          |

|            |        |    |                   |
|------------|--------|----|-------------------|
| Dlx-1      | M01439 | 69 | NNGNNNTAATTANY    |
| Vax-2      | M01327 | 67 | NNNNACTAATTANNNC  |
| Nkx3-1     | M00451 | 67 | NWATAAGTATWT      |
| Prop-1     | M01320 | 66 | NNNNTTAATTAANNNNC |
| ATF2:c-Jun | M00041 | 65 | TGACGTYA          |
| HSF1       | M00146 | 64 | RGAANRTTCN        |
| Brn-4      | M01473 | 64 | NNNTAATTAATTANNNN |
| Pbx-1b     | M00124 | 63 | NNCATCAATCAANNW   |
| Cdc5       | M00478 | 63 | GATTTAACATAA      |
| HOXA4      | M01370 | 59 | NNTNATTAATTAACKNG |
| Barx-2     | M01431 | 59 | TAANTAATTANTKNTN  |
| PMX2B      | M01356 | 58 | NNNAATTAATTAANNNG |
| LH-2       | M01325 | 58 | WNNACTAATTAGNNNNN |
| K-2b       | M01348 | 55 | NNAACTAATTARYTNNT |
| Msx-1      | M01412 | 54 | NNNNANTAATTANTNN  |
| ALX-3      | M01355 | 51 | WNNAYTAATTARYTNNN |
| CART1      | M01453 | 49 | NNMNTTAATTAANNNNN |
| Cdx-2      | M00729 | 48 | ANANTTTTATKRCC    |
